# Supplementary material for: Larval application of sodium channel homologous dsRNA restores pyrethroid insecticide susceptibility in a resistant adult mosquito population
Source: PubMed Central journal article supplement (PMC4946210; doi:10.1186/s13071-016-1634-y), 2016-07-14
Supplement: 13071_2016_1634_MOESM1_ESM.pdf [file 13071_2016_1634_MOESM1_ESM.pdf]

Additional file 1 - Table. List of primers used in Real-time PCR (qPCR) and in dsRNA production

| <b>Gene</b>                     | <b>Primer Sequence (5'-3')*</b>                                                                                                           | <b>Position in the gene</b> | <b>Applica-tion</b> | <b>Access number</b>         |
|---------------------------------|-------------------------------------------------------------------------------------------------------------------------------------------|-----------------------------|---------------------|------------------------------|
| <b>Tubulin</b>                  | <i>Forward:</i> CTGCCACCTTCATCGGTAAC<br><i>Reverse:</i> TGTTCCGAGATACGCTTGAAC                                                             | -                           | qPCR                | XM_001655975.1               |
| <b>Sodium channel (VGSC)</b>    | <i>Forward:</i> CGGAGGCGTTCAATCGGATA<br><i>Reverse:</i> TGGACATACCCCTTTGCCTG                                                              | -                           | qPCR                | KC107440.1                   |
| <b>VGSC Tile 1</b>              | <i>Forward:</i> TAATACGACTCACTATAGGGAGA<br>ACTGGTTTTGGTCGGAAGAA<br><i>Reverse:</i> TAATACGACTCACTATAGGGAGA<br>TGAAAACAGTGGATGTACTAAAATAT  | 148-465                     | dsRNA production    | KC107440.1                   |
| <b>VGSC Tile 2</b>              | <i>Forward:</i> TAATACGACTCACTATAGGGAGA<br>ATCCTATACGTCGCGTAGCT<br><i>Reverse:</i> TAATACGACTCACTATAGGGAGA<br>ACATTGTTAAAATTATCACATC      | 416-837                     | dsRNA production    | KC107440.1                   |
| <b>VGSC Tile 3</b>              | <i>Forward:</i> TAATACGACTCACTATAGGGAGA<br>TCATAGAGTCCGTTAAGAATCTC<br><i>Reverse:</i> TAATACGACTCACTATAGGGAGA<br>AGACGAAAGGCAGATAAGAATG   | 788-1145                    | dsRNA production    | KC107440.1                   |
| <b>VGSC Tile 4</b>              | <i>Forward:</i> TAATACGACTCACTATAGGGAGA<br>TATACAAGTTTCGATACTTTCGGA<br><i>Reverse:</i> TAATACGACTCACTATAGGGAGA<br>TGCCCTTCTCTGGTTAC       | 1096-1495                   | dsRNA production    | KC107440.1                   |
| <b>VGSC Tile 5</b>              | <i>Forward:</i> TAATACGACTCACTATAGGGAGA<br>GGACTTTTCCTGCCACAGCT<br><i>Reverse:</i> TAATACGACTCACTATAGGGAGA<br>GATGATTGCACCATTTTCCTC       | 1446-1782                   | dsRNA production    | KC107440.1                   |
| <b>VGSC Tile 6</b>              | <i>Forward:</i> TAATACGACTCACTATAGGGAGA<br>ATGACTCGAACGCGGTCAC<br><i>Reverse:</i> TAATACGACTCACTATAGGGAGA<br>ATATCGTTTAACACCATCACGT       | 1733-2132                   | dsRNA production    | KC107440.1                   |
| <b>VGSC Tile 7</b>              | <i>Forward:</i> TAATACGACTCACTATAGGGAGA<br>CAAACACAAACCGTAGTAGATATG<br><i>Reverse:</i> TAATACGACTCACTATAGGGAGA<br>TCGCAATCAGCTTCATCGTT    | 2083-2506                   | dsRNA production    | KC107440.1                   |
| <b>VGSC Tile 8</b>              | <i>Forward:</i> TAATACGACTCACTATAGGGAGA<br>TTTTTTCACGGCGACCTTCG<br><i>Reverse:</i> TAATACGACTCACTATAGGGAGA<br>CGATG TAGTTCTTGCCGAACA      | 2457-2794                   | dsRNA production    | KC107440.1                   |
| <b>Cytocrome p450 (CYP9J26)</b> | <i>Forward:</i> TAATACGACTCACTATAGGGAGA<br>CTTCAACGACTTCGTCGGATCA<br><i>Reverse:</i> TAATACGACTCACTATAGGGAGA<br>GTCCACCTTGATTCCAAAAGCACAC | -                           | dsRNA production    | JF924909.1<br>XM_001649047.2 |
| <b>Cytocrome p450 (CYP9J32)</b> | <i>Forward:</i> TAATACGACTCACTATAGGGAGA<br>TTCAACGATTTCATCCAGACCA<br><i>Reverse:</i> TAATACGACTCACTATAGGGAGA<br>GTAATCCACGTAGCCCCGATTC    | -                           | dsRNA production    | XM_001653404.2               |

\*The first 23 nucleotides in 5' position of all primers used in dsRNA production refers to T7 promoter sequence.
