# Supplementary material for: Larval application of sodium channel homologous dsRNA restores pyrethroid insecticide susceptibility in a resistant adult mosquito population
Source: PubMed Central journal article supplement (PMC4946210; doi:10.1186/s13071-016-1634-y), 2016-07-14
Supplement: 13071_2016_1634_MOESM4_ESM.pdf [file 13071_2016_1634_MOESM4_ESM.pdf]

Additional file 3. Table. Frequency of the 1016 and 1534 mutations in the sodium channel gene of the Rio de Janeiro strain of *A. aegypti*

| <b>Genotype Frequency</b> |                       |      |                       |      |
|---------------------------|-----------------------|------|-----------------------|------|
| <b>Phenotype</b>          | <b>Mutation #1016</b> |      | <b>Mutation #1534</b> |      |
| Susceptible               | Val/Val               | 0.31 | Phe/Phe               | 0.05 |
|                           | Val/Ile               | 0.20 | Phe/Cys               | 0.35 |
| Resistant                 | Ile/Ile               | 0.49 | Cys/Cys               | 0.60 |
| <b>Allelic Frequency</b>  |                       |      |                       |      |
| Wild                      | Val                   | 0.41 | Phe                   | 0.23 |
| Mutant                    | Ile                   | 0.59 | Cys                   | 0.77 |
