# Supplementary material for: Larval application of sodium channel homologous dsRNA restores pyrethroid insecticide susceptibility in a resistant adult mosquito population
Source: PubMed Central journal article supplement (PMC4946210; doi:10.1186/s13071-016-1634-y), 2016-07-14
Supplement: 13071_2016_1634_MOESM6_ESM.pdf [file 13071_2016_1634_MOESM6_ESM.pdf]

Sodium channel gene variants

| length | exon#   | KC107440 Waco | AY663378 clone_AEL2 | AY663377 clone_AER2 | EU792890 clone_pK33 | EU784647 clone_PN9 | AY663385.1 partial | EU399180 NS | EU399179 Bora | AAEL006019 RD | AAEL006019 RA | AAEL006019 RB | AAEL006019-RC | XM_001649431.1 AAEL004612-RA | AAEL008297 -RA | EU399181 P er-R | AB909019 SMK | XM_001663390.1 AAEL013277-RA            |
|--------|---------|---------------|---------------------|---------------------|---------------------|--------------------|--------------------|-------------|---------------|---------------|---------------|---------------|---------------|------------------------------|----------------|-----------------|--------------|-----------------------------------------|
| 147    | 1       | 1-127         | -                   | -                   | -                   | -                  | -                  | 1-147       | 1-147         | -             | -             | -             | -             | 1-127                        | -              | 1-147           | 1-127        |                                         |
| 33     | 2(j)    | 128-160       | -                   | -                   | -                   | -                  | -                  | 148-180     | 148-180       | -             | -             | -             | -             | 128-160                      | 1-13           | 148-180         | 128-160      |                                         |
| 156    | 3       | 161-317       | -                   | -                   | 1-56                | 1-56               | 1-128              | 181-337     | 181-337       | -             | -             | -             | -             | 161-317                      | 14-170         | 181-337         | 161-317      |                                         |
| 206    | 4       | 318-523       | -                   | -                   | 57-262              | 57-262             | 129-334            | 338-543     | 338-543       | -             | -             | -             | -             | 318-346                      | 171-376        | 338-543         | 318-523      |                                         |
| 129    | 5       | 524-652       | -                   | -                   | 263-391             | 263-391            | 335-463            | 544-672     | 544-672       | -             | -             | -             | -             | -                            | 377-505        | 544-672         | 524-652      |                                         |
| 92     | 6       | 653-744       | -                   | -                   | 392-483             | 392-483            | 464-555            | 673-764     | 673-764       | 1-73          | 1-73          | 1-73          | 1-73          | -                            | 506-597        | 673-764         | 653-744      |                                         |
| 213    | 7       | 745-957       | -                   | -                   | 484-696             | 484-696            | 556-768            | 765-977     | 765-977       | 74-286        | 74-286        | 74-286        | 74-286        | -                            | 598-810        | 765-977         | 745-957      |                                         |
| 61     | 8       | 958-1018      | -                   | -                   | 697-757             | 697-757            | 769-829            | 978-1038    | 978-1038      | 287-347       | 287-347       | 287-347       | 287-347       | -                            | 811-917        | 978-1038        | 958-1018     |                                         |
| 145    | 9       | 1019-1163     | 1-17                | -                   | 758-902             | 758-902            | 830-974            | 1039-1183   | 1039-1183     | 348-492       | 348-492       | 348-492       | 348-492       | -                            | 918-1058       | 1039-1183       | 1019-1163    |                                         |
| 165    | 10      | 1164-1328     | 18-182              | -                   | 903-1067            | 903-1067           | 975-1139           | 1184-1348   | 1184-1348     | 493-657       | 493-657       | 493-657       | 493-657       | -                            | 1059-1223      | 1184-1348       | 1164-1328    |                                         |
| 276    | 11_j    | 1329-1604     | 183-458             | -                   | 1068-1343           | 1068-1343          | 1140-1415          | 1349-1624   | 1349-1624     | 658-876       | 658-933       | 658-933       | 658-933       | -                            | 1224-1499      | 1349-1624       | 1329-1604    |                                         |
| 21     | 12(n)   | 1605-1623     | 459-478             | -                   | 1344-1363           | 1344-1363          | 1416-1435          | 1625-1644   | 1625-1644     | -             | 934-954       | 934-952       | 934-953       | -                            | 1500-1519      | 1625-1645       | 1605-1624    |                                         |
| 63     | 13(a)   | -             | 479-521             | -                   | 1364-1406           | 1364-1406          | 1436-1478          | 1645-1687   | 1645-1687     | 877-921       | 955-1017      | -             | 954-996       | -                            | 1520-1562      | 1646-1708       | 1625-1667    |                                         |
| 184    | 14_m_14 | 1624-1788     | 522-705             | -                   | 1407-1590           | 1407-1590          | 1479-1662          | 1688-1871   | 1688-1871     | 922-1087      | 1018-1183     | 953-1117      | 997-1180      | -                            | 1563-1746      | 1709-1892       | 1668-1851    |                                         |
| 203    | 15      | 1789-1991     | 706-908             | -                   | 1591-1793           | 1591-1793          | 1663-1865          | 1872-2074   | 1872-2074     | 1088-1272     | 1184-1368     | 1118-1320     | 1181-1383     | -                            | 1747-1949      | 1893-2095       | 1852-2054    |                                         |
| 100    | 16      | 1992-2091     | 909-1008            | -                   | 1794-1893           | 1794-1893          | 1866-1965          | 2075-2174   | 2075-2174     | 1273-1372     | 1369-1468     | 1321-1420     | 1384-1483     | -                            | 1950-2049      | 2096-2195       | 2055-2154    |                                         |
| 69     | 17_b_17 | 2092-2160     | 1009-1077           | -                   | 1894-1962           | 1894-1962          | 1966-2034          | 2175-2243   | 2175-2243     | 1373-1441     | 1469-1537     | 1421-1489     | 1484-1552     | -                            | 2050-2118      | 2196-2264       | 2155-2223    |                                         |
| 278    | 18      | 2161-2438     | 1078-1331           | -                   | 1963-2216           | 1963-2240          | 2035-2312          | 2244-2521   | 2244-2521     | 1442-1719     | 1538-1791     | 1490-1743     | 1553-1830     | -                            | 2119-2372      | 2265-2542       | 2224-2477    |                                         |
| 174    | 19      | 2439-2612     | 1332-1505           | -                   | 2217-2390           | 2241-2414          | 2313-2486          | 2522-2695   | 2522-2695     | 1720-1893     | 1792-1965     | 1744-1917     | 1831-2004     | -                            | 2373-2546      | 2543-2716       | 2478-2651    | 421-437 (106-122)                       |
| 163    | 20(d)   | 2613-2775     | 1506-1590           | -                   | 2391-2553           | 2415-2577          | 2487-2649          | 2696-2858   | 2696-2858     | 1894-2056     | 1996-2128     | 1918-2080     | 2005-2167     | -                            | 2547-2709      | 2717-2879       | 2652-2814    | 592-614 (92-114)                        |
| 188    | 21      | 2776-2963     | -                   | 1-119               | 2554-2741           | 2578-2765          | 2650-2837          | 2859-3046   | 2859-3046     | 2057-2244     | 2129-2316     | 2081-2268     | 2168-2355     | -                            | 2710-2748      | 2880-3067       | 2815-3002    | 763-802 (106-145)                       |
| 247    | 22_e    | 2964-3191     | -                   | 120-342             | 2742-2968           | 2766-3012          | 2838-3065          | 3047-3293   | 3047-3293     | 2245-2471     | 2317-2539     | 2269-2495     | 2356-2583     | -                            | -              | 3068-3314       | 3003-3229    |                                         |
| 212    | f_f_23  | 3192-3383     | -                   | 343-509             | 2969-3131           | 3013-3194          | 3066-3257          | 3294-3505   | 3294-3505     | 2472-2634     | 2540-2706     | 2496-2658     | 2584-2775     | -                            | -              | 3315-3526       | 3230-3392    |                                         |
| 220    | h_24    | 3384-3603     | -                   | 510-651             | 3132-3273           | 3195-3414          | 3258-3477          | 3506-3725   | 3506-3725     | 2635-2776     | 2707-2848     | 2659-2800     | 2776-2995     | -                            | -              | 3527-3746       | 3393-3612    |                                         |
| 266    | 25      | 3604-3869     | -                   | 652-917             | 3274-3539           | 3415-3680          | 3478-3743          | 3726-3991   | 3726-3991     | 2777-3042     | 2849-3114     | 2801-3066     | 2996-3261     | -                            | -              | 3747-4012       | 3613-3878    |                                         |
| 174    | 26      | 3870-4043     | -                   | 918-1091            | 3540-3713           | 3681-3854          | 3744-3917          | 3992-4165   | 3992-4165     | 3043-3216     | 3115-3288     | 3067-3240     | 3262-3435     | -                            | -              | 4013-4186       | 3879-4052    |                                         |
| 123    | 27(l)   | 4044-4166     | -                   | 1092-1214           | 3714-3836           | 3855-3977          | 3918-4040          | 4166-4288   | 4166-4288     | 3217-3339     | 3289-3411     | 3241-3363     | 3436-3558     | -                            | -              | 4187-4309       | 4053-4175    |                                         |
| 123    | 28      | 4167-4289     | -                   | 1215-1337           | 3837-3959           | 3978-4100          | 4041-4163          | 4289-4411   | 4289-4411     | 3340-3462     | 3412-3534     | 3364-3486     | 3559-3681     | -                            | -              | 4310-4432       | 4176-4298    |                                         |
| 195    | 29      | 4290-4484     | -                   | 1338-1532           | 3960-4154           | 4101-4295          | 4164-4358          | 4412-4606   | 4412-4606     | 3463-3657     | 3535-3729     | 3487-3681     | 3682-3876     | -                            | -              | 4433-4627       | 4299-4493    | 1792-1802 (130-140)                     |
| 246    | 30      | 4485-4730     | -                   | 1533-1728           | 4155-4400           | 4296-4541          | 4359-4604          | 4607-4852   | 4607-4852     | 3658-3903     | 3730-3975     | 3682-3927     | 3877-4122     | -                            | -              | 4628-4873       | 4494-4739    | 1931-2010 (63-142), 2018-2028 (206-216) |
| 271    | 31      | 4731-5001     | -                   | -                   | 4401-4671           | 4542-4812          | 4605-4875          | 4853-5123   | 4853-5123     | 3904-4174     | 3976-4246     | 3928-4198     | 4123-4393     | -                            | -              | 4874-5144       | 4740-5010    | 2338-2354 (232-248)                     |
| 305    | 32      | 5002-5306     | -                   | -                   | 4672-4976           | 4813-5117          | 4876-5180          | 5124-5428   | 5124-5428     | 4175-4479     | 4247-4551     | 4199-4503     | 4394-4698     | -                            | -              | 5145-5449       | 5011-5315    | 2563-2573 (186-196)                     |
| >993   | 33      | 5307-6321     | -                   | -                   | 4977-5991           | 5118-6132          | 5181-6317          | 5429-6554   | 5429-6554     | 4480-5575     | 4552-5647     | 4504-5599     | 4699-4794     | -                            | -              | 5450-6580       | 5316-6330    | 2722-2733 (40-51), 2875-2897 (193-215)  |
